# Supplementary material for: Linear Motif-Mediated Interactions Have Contributed to the Evolution of Modularity in Complex Protein Interaction Networks
Source: PLoS Comput Biol. 2014 Oct 9;10(10):e1003881. doi: 10.1371/journal.pcbi.1003881 (PMC4191887; doi:10.1371/journal.pcbi.1003881)
Supplement: Table S7 — Module membership of proteins for PPI modules and DLI/DDI modules. (XLSX) [file pcbi.1003881.s019.xlsx]

## Sheet: Sheet1
Table S7. Module membership of proteins for PPI modules and DLI/DDI modules
UniprotAccesion	Module ID
	PPI module	DLI/DDI module
Q8TBF5	9	11
Q8TBF4	1	2
Q5MIZ7	0	5
P30613	0	0
Q5H9L4	1	0
Q9NQ76	0	1
Q9NVL1	0	13
O95342	0	8
Q9NQ75	0	1
P20930	0	1
P20933	0	8
P20936	0	1
Q9NZV5	0	0
Q8NFX7	0	8
Q496A3	4	0
P83859	2	3
Q8TBF2	0	0
Q15573	1	0
Q15572	1	9
P23919	5	13
Q8NHX9	0	13
Q9NXR8	1	0
Q9C0H2	0	0
Q9C0H5	0	1
Q4VXU2	2	0
Q68DE3	1	0
Q00535	0	0
Q9NXR1	1	5
Q00537	0	0
Q07960	0	1
Q9NXR5	2	0
Q00532	0	-
O00244	0	13
Q96J65	0	0
O00241	0	0
O00716	1	9
Q8IX01	1	0
Q9UBM1	0	14
Q9UBM7	1	0
Q6UXI9	0	1
Q13835	0	16
Q7Z3T1	2	3
A0AVF1	0	0
P40424	1	4
P40425	1	4
P40426	1	4
P40429	3	2
Q71RG4	0	0
Q7Z3T8	0	0
Q13838	1	2
Q8WTV0	0	0
P08842	4	28
P03891	3	7
P48960	0	2
O15079	0	8
P02768	0	8
P05386	3	2
Q5TAX3	1	0
P02760	0	1
P02763	0	10
P02765	0	0
P02766	0	10
Q7L266	0	0
Q9UQ07	0	0
Q9UJ70	4	2
Q9UQ03	3	1
Q9UJ72	0	2
Q15165	0	0
Q9UJ78	1	0
Q86WA9	0	0
P35579	0	1
O15254	3	11
O15255	0	0
Q86WA8	0	11
Q6ZTI6	1	10
O15258	3	2
O15259	0	0
Q86XA0	0	5
P29401	0	6
P29400	0	1
Q5VWT5	1	10
Q9H0S4	1	0
P07900	0	0
P20810	0	9
Q5T5X7	1	0
Q2VWP7	0	0
Q8WX94	0	0
P21731	2	3
Q96CS2	1	9
Q69384	4	0
Q9P219	0	2
Q9P218	0	1
Q5W111	0	0
Q96CS7	0	6
Q9P215	0	0
P62807	0	0
Q9UK11	0	0
Q01113	0	1
Q9UK17	1	12
Q9BVC3	1	0
Q8N6K7	1	13
Q92833	1	0
Q92832	0	5
Q92831	1	0
Q92830	1	0
Q92837	0	0
Q9H3M9	0	0
Q92835	0	1
P00540	0	0
Q969K7	1	0
Q92839	1	0
Q9H3M7	0	0
Q9H3M0	0	12
P51878	0	0
Q8IY95	0	7
Q9BZG1	0	1
Q8TAL5	2	1
Q9Y6E0	1	0
B4DJY2	0	0
O43933	3	0
O43930	0	0
Q9NZL9	0	25
Q9BZG8	1	0
Q9Y597	0	8
Q5TZA2	1	0
Q9Y592	0	0
P01236	0	1
A8TX70	0	1
Q71UI9	1	2
P01233	2	3
Q09161	1	2
Q09160	0	8
P50225	0	0
Q05952	0	0
Q6NX49	0	1
Q9UKZ9	0	1
P09001	1	2
P53708	0	1
P04035	0	0
P60520	0	6
Q86W92	0	1
Q9UKZ1	1	34
P53701	2	0
Q14568	1	0
Q9H967	1	0
Q14563	0	1
Q14562	1	2
Q8WYB5	1	0
Q86TG7	0	0
Q14565	1	13
Q9NWM3	0	0
Q6P1A2	5	14
Q9NRH1	0	6
Q9NRH2	0	0
Q9NRH3	4	5
Q9UHF1	0	23
Q9UHF0	2	3
Q9UHF3	1	0
Q96PG8	0	17
P41218	1	0
P41219	0	9
Q9UHF7	1	0
P41214	1	6
Q86VP1	0	30
P41217	2	-
Q9UHC6	0	0
P41212	1	4
Q92527	0	0
Q92526	0	0
Q92521	0	11
Q92520	3	7
Q92523	4	0
Q92522	1	0
Q92529	0	1
P35452	1	4
Q9H4P4	0	0
P23352	0	1
Q53HV7	5	22
Q5T9C9	0	14
Q02878	1	2
Q9HAP6	0	12
P27449	0	7
P27448	0	0
Q9HAP2	0	4
Q96HA7	1	1
Q96HA1	1	2
P86397	13	22
Q6PII5	1	0
Q96HA9	0	11
Q96HA8	1	13
P07204	0	1
O75164	1	-
O75165	0	0
O75167	0	0
Q9H211	1	4
O75161	0	0
Q9H213	5	28
Q96G23	3	11
Q5VZL5	1	0
Q96G21	2	0
P06865	0	23
Q96G27	0	11
Q96G25	1	10
Q9BWU0	1	0
Q13239	0	1
Q9NSA2	0	12
Q8TEH3	0	6
Q13232	0	13
Q13233	0	6
Q13231	0	1
Q5TBA9	0	0
Q13237	0	1
O60381	1	0
Q8HWS3	1	4
Q9C0H9	0	8
P30872	2	3
Q00534	1	4
P53041	0	0
Q15762	0	12
P10914	0	0
Q00536	0	0
P10911	0	1
Q6UW02	2	1
Q6UW01	34	56
P10912	0	1
Q15768	0	1
Q76NI1	1	0
P23743	2	1
O95528	0	0
Q8WUF8	2	0
Q9H596	2	1
Q8WUF5	1	0
Q96BT3	1	5
O95522	0	0
O95521	0	0
P29083	1	0
Q02297	0	1
O00712	1	4
P48147	2	0
P48146	2	3
P48145	2	3
Q99519	0	23
O15417	1	0
Q9BQG0	1	2
Q9BQG1	0	12
Q96RU7	0	0
Q6PL24	0	0
Q96RU3	0	1
Q96RU2	0	0
Q6VMQ6	0	8
Q9NYU1	0	11
Q9NYU2	0	8
Q96RU8	0	0
Q96DR4	0	0
A4D1P6	0	8
P20393	1	0
Q96L58	0	10
O94766	0	10
P55145	0	0
P50395	0	1
Q96A84	1	2
Q96DR8	6	10
Q96L50	1	0
P50391	2	3
Q9Y5A7	0	0
Q9Y5A6	4	4
I1YAP6	0	0
Q8NDW4	0	0
P21675	1	0
Q13643	0	9
Q13642	0	9
Q13641	1	11
P40305	1	0
P40306	1	0
Q9NS40	0	12
Q6XQN6	0	13
Q02127	3	0
Q8IUM7	1	0
A6NE52	1	0
P78358	0	8
P62380	1	0
Q9BQ15	1	0
Q9BXJ8	1	11
P21673	1	6
Q9BQ16	0	1
P49585	5	14
Q96CN9	4	6
P42680	0	1
P06239	0	1
Q6ZRV2	1	0
Q96KM6	0	0
Q7L985	2	1
Q92917	1	9
Q96CN7	2	0
Q96CN5	0	1
Q96CN4	0	1
Q03188	1	5
O15069	0	6
O15068	0	1
Q5RKV6	1	2
Q8N0X2	2	59
O15063	0	6
P10644	0	12
O15061	0	1
Q9H6R7	0	0
O15067	0	6
O15066	0	5
P60891	0	13
Q86WN1	0	1
P36894	0	15
Q8NAP8	1	2
Q9BXJ7	3	11
P07093	0	1
Q8NAP3	4	18
Q9NZM5	1	0
Q9NZM4	0	0
Q9NZM3	0	1
P16422	0	0
Q9NZM1	1	0
Q86XT2	0	0
Q01968	0	1
Q14CS0	0	0
Q8NGF0	2	3
P16189	0	8
Q8N5G2	4	0
Q8N0X4	0	8
P15382	0	12
A1A5B4	0	0
Q03989	1	0
Q96NH3	0	6
Q06609	1	13
Q9BR01	5	10
P16520	0	3
Q9Y291	0	0
Q9Y296	4	18
Q9Y297	0	0
Q9Y294	1	0
Q9Y295	0	0
Q9BR09	0	0
Q12834	1	0
Q6ICB4	0	1
P56747	0	0
Q6IA17	0	20
P30281	1	0
P49795	2	3
Q5FYB0	4	28
P49796	0	3
P49790	1	2
P49792	1	0
B0I1T2	0	1
Q8N6V9	1	9
Q86VD1	0	0
P51114	1	2
P55286	0	16
Q9H7L9	1	10
P35070	0	1
Q587I9	0	0
Q9H7L2	1	0
Q9Y2T5	1	9
Q9Y2T4	0	0
O60814	1	0
O60547	0	10
O60812	1	0
Q5T7V8	0	36
Q9Y2T3	0	0
O60811	0	0
Q6ZVK8	1	9
Q8IU60	1	2
Q8N8Y2	3	2
Q9P0L0	0	11
P31483	1	2
Q9P0L2	0	0
Q92665	1	0
O00399	0	1
Q9P0L9	0	1
P58400	0	29
Q9BZ68	0	0
Q12802	0	1
Q92738	0	1
O75420	0	34
P35251	1	0
P35250	1	0
Q08170	1	2
O75427	4	0
O75426	0	0
Q92730	0	1
Q92731	1	0
Q92733	1	2
Q92734	0	0
Q9H773	1	13
Q92736	0	12
P43026	0	15
P23109	0	6
O60609	-	44
Q02846	2	26
Q00765	0	11
Q9UH77	2	0
O60603	0	20
O60602	0	20
Q8NBH2	0	1
Q5BKT4	0	12
P55285	0	16
P17693	0	8
O00507	1	0
O00505	1	0
P17927	0	1
O00501	0	2
Q99612	1	0
P20132	1	11
Q96CX3	0	0
Q7Z2Y8	1	0
P01009	0	1
P01008	0	1
Q9H7M9	4	0
Q01581	1	10
Q8N2R0	2	0
P05388	3	2
B7U540	0	0
Q8NGN6	2	3
Q9BXB5	0	9
Q13003	0	3
Q13002	0	3
Q8NGN2	2	3
Q8NGN3	2	3
Q8NGN0	2	3
Q8NGN1	2	3
Q13009	0	1
O75391	0	2
Q8IYD8	0	0
O75396	0	8
Q8NGN8	2	3
O75394	1	0
Q9Y4F9	0	2
P51522	0	0
Q8IVD9	1	0
Q8TE68	0	1
Q8TE69	0	7
Q9Y4F1	2	0
Q8TE67	0	0
Q9Y4F3	1	0
Q99075	0	1
Q9Y4F5	0	5
Q9Y4F4	1	0
Q8N328	1	4
Q96R69	2	3
Q96R67	2	3
Q8N456	1	9
P46013	1	0
Q66K89	1	0
Q8WVD5	0	0
Q8WVD3	1	0
P46019	0	18
Q9NPG3	1	0
P98073	0	13
Q9BSD7	0	0
O94979	0	0
P42772	1	0
P98077	0	1
Q9NPG4	0	1
O94972	0	9
O94973	0	8
P68543	0	0
Q9NPG8	0	4
Q5T3J3	1	4
Q9Y6X1	0	13
Q96LX8	0	0
P30154	0	0
Q8WXH0	1	9
Q8TC07	0	1
Q8TC05	1	0
P41970	0	0
Q9UGC7	0	0
Q9UGC6	2	3
P23467	0	1
Q9UI08	0	1
Q9UI09	3	7
Q8N4X5	1	9
Q96JL9	1	0
Q9Y2U8	1	4
Q8WV16	1	0
Q8WV19	0	0
Q9HCQ5	6	10
Q9HCQ7	0	1
Q9H0W5	0	0
P22760	1	0
Q6NUI2	5	14
Q6NUI1	2	1
P19440	3	7
P19447	1	0
P26651	1	0
Q16518	5	10
Q2VIR3	1	2
Q96LZ2	1	0
Q96LZ3	2	20
Q16514	1	0
Q99928	5	24
Q16517	0	18
Q16512	0	1
Q16513	0	0
P11836	0	8
Q14002	0	1
Q14003	1	0
Q14004	1	33
Q14005	0	3
Q9H3P7	0	0
O77932	1	2
Q8WY22	0	0
Q8WY21	0	1
P19224	3	7
Q8NCW0	0	0
Q8NCW5	0	10
Q9NUT2	3	7
Q6Y288	2	0
Q8NCW6	6	10
Q9BUV0	1	2
Q9HA77	10	16
Q7Z6L0	0	8
Q9Y3A5	1	11
Q9UFC0	1	0
O14939	0	14
O14936	0	1
O43325	0	8
O43324	0	6
O43323	7	32
O14933	0	0
O14931	0	20
P04839	0	1
P49406	1	2
Q6PEV8	2	0
O60341	1	0
Q8IZJ3	2	19
Q8IZJ1	0	32
Q8IZJ6	4	5
Q8IZJ4	0	1
Q7Z7F7	1	7
Q7Z7F0	1	2
P56937	5	36
Q9NY30	0	0
Q9Y2K5	4	0
Q9Y2K6	0	0
Q9Y2K7	0	0
P37088	0	13
Q9Y2K1	1	0
Q9Y2K2	0	0
Q9Y2K3	0	0
Q9UHY1	1	0
Q96MT3	4	2
Q96MT1	0	0
Q9UHY7	0	9
Q9UHY8	1	5
O14681	0	0
O14682	0	0
O14683	4	4
O14684	2	3
Q8N1P7	0	0
O14686	1	0
Q96MT8	4	5
A5A3E0	0	0
Q8IV08	0	14
Q9UNE7	0	0
Q9UNE2	0	1
Q9UNE0	0	0
Q86XA9	1	0
Q00975	0	3
Q00973	0	0
Q86SZ2	4	18
Q00978	0	0
Q6P6B1	0	0
Q7Z713	0	0
Q9BYM8	0	0
P22888	2	3
P50895	5	0
P50897	1	11
Q9NSA3	0	0
P49895	1	2
Q8IY21	0	1
Q63HM1	2	9
Q14195	0	14
Q63HM2	4	5
O95755	0	1
O95754	0	1
O95757	0	0
O95751	1	13
O95750	0	1
Q8WWC4	3	13
P13349	1	4
Q6UY11	4	1
Q13588	0	1
O95758	1	2
Q15517	0	11
Q9BWH6	1	5
Q8NHV9	1	1
P34969	2	3
Q9BWH2	1	6
Q8NHV4	4	0
Q6YP21	0	6
P23975	0	0
Q6TDP4	1	0
P05013	0	27
Q9C0J9	1	0
Q9C0J8	1	0
P05014	0	27
P05015	0	27
Q10589	0	0
Q68DK7	1	30
Q9C0J1	6	10
P05019	0	1
Q68DK2	4	0
P01920	0	8
O00268	1	0
O00267	1	0
O00264	3	7
P08865	3	2
P33947	4	11
Q9H2K2	0	0
Q9H2K0	1	0
Q7Z3Z4	1	2
Q7Z3Z0	0	0
Q7Z3Z3	1	2
Q9H2K8	0	0
Q9NQ55	1	0
P56559	0	0
Q96CS3	0	0
Q9NQ50	1	7
P37275	1	4
Q9H9E3	16	8
Q96CS4	1	0
P56556	3	7
Q9NV29	5	0
O60248	1	4
Q92819	0	5
Q5QJ38	1	0
Q9UK13	1	0
O95340	5	10
P55061	0	17
O95347	1	5
Q9UQ26	0	1
Q9UK12	0	0
Q9UJ96	0	12
Q6PK81	1	0
Q8IWV8	0	0
Q9UJ90	2	1
Q9H0Q3	5	16
P10451	0	5
P62805	1	0
P60174	0	8
Q8N543	1	0
P19113	2	1
P43234	0	2
P43235	0	3
Q49AG3	0	4
Q12983	0	17
Q12982	0	17
Q12981	0	17
Q12980	1	12
Q53G59	0	0
P38398	1	0
P29466	0	0
Q9Y605	1	5
Q9P212	0	1
Q9Y600	1	6
Q9Y603	0	0
Q93100	0	18
Q8N6M3	0	0
P28482	0	0
Q9Y6V0	0	1
Q8N6M6	1	9
Q9P232	1	8
Q96NY8	0	12
Q7RTU3	1	4
Q9NP55	0	0
Q7RTU1	1	4
Q7RTU0	1	4
P28332	0	1
P28330	3	7
P28331	3	7
Q9UIB8	0	1
P62829	3	2
Q96CU9	3	7
P62820	0	1
P17936	0	1
Q6ZW49	1	0
P62826	1	2
P18615	1	2
Q8N5M9	0	11
P21452	2	3
P51858	1	0
P51857	5	10
P0C7I6	1	5
P21453	2	3
P17026	2	1
P02743	0	1
P02741	0	1
O43913	1	9
O43914	0	8
Q9Y6G9	0	5
P02745	0	1
O43918	1	0
Q9Y6G5	0	0
P02749	0	1
P02748	0	20
Q8TAB3	1	0
Q9Y6G3	1	7
P01210	2	3
O95967	0	1
Q92838	0	0
P01215	2	3
Q18PE1	0	6
Q9UKX3	0	2
Q96QS6	0	0
Q96QS3	0	2
Q6PHW0	4	9
Q969K3	0	0
P43490	4	13
P45984	0	0
Q99877	1	0
P78314	0	1
Q9Y6E2	0	2
Q9NWT8	1	0
Q9H987	0	0
P35626	2	0
P35625	0	1
Q9NRD1	0	0
Q9BZG2	1	0
P45983	0	0
P23470	0	1
Q01085	1	2
Q9Y6E7	3	10
Q9UHD9	0	0
Q9UHD8	3	11
Q96I25	1	2
Q9UHD2	0	0
Q9UHD1	0	0
Q9UHD0	11	27
Q9UHD4	3	17
Q7Z5G4	1	4
Q92508	0	5
Q92506	1	5
Q92504	0	0
Q92503	0	0
Q92502	0	1
Q96I24	1	2
P08195	0	1
P23378	0	0
Q9H2F5	1	0
Q9NVV9	1	2
P16519	2	19
P50991	0	0
Q969P0	1	0
P17482	1	4
P17483	1	0
P17480	1	0
P17481	1	4
P08034	0	24
Q8TD20	0	0
Q6UX15	0	0
Q5VZR4	0	0
P50995	0	8
Q5W0Z9	0	0
Q96HC4	0	2
Q9Y6A5	0	8
Q8WU58	1	0
Q9UEF7	0	1
Q13214	0	1
Q6KCM7	0	0
Q13216	1	0
Q13217	3	0
Q9H239	0	1
Q9H237	4	21
Q8IYE0	1	0
O75185	0	12
O75182	1	0
Q13219	0	1
Q13017	0	1
Q99685	2	14
Q99684	1	0
Q99687	0	4
Q12931	0	0
Q9BWW8	0	0
Q9BWW9	0	1
P14618	0	6
P14616	0	1
Q17R60	1	0
P11226	0	1
Q8NEQ6	2	1
Q99689	1	5
P63010	0	8
Q8N865	2	1
Q8N157	0	1
Q8IUG5	0	1
Q8N159	0	6
Q8N158	0	10
Q13574	0	1
Q6UW60	0	1
Q6UW63	1	0
Q96BR1	0	0
Q96BR6	0	0
Q96BR5	3	7
Q15744	1	0
Q6UW68	0	0
Q15746	0	0
Q96BR9	4	2
Q15742	1	0
Q15743	2	3
Q86X76	1	0
Q6ZSJ8	0	15
P23769	1	0
O15432	2	19
Q16378	0	12
O95502	3	0
O95503	1	0
P23760	1	0
O15439	0	0
P23763	0	8
Q9NYK6	1	9
Q9BQE9	1	0
Q9NYK5	1	7
Q02410	0	29
Q99538	0	8
Q99536	1	1
Q9BQE3	0	0
Q9BQE4	0	0
Q9BQE5	1	0
P11086	1	9
Q96RS0	1	9
P41091	3	2
Q9H0N0	3	0
Q96RS6	1	0
Q5VWI1	0	0
Q9UJT9	2	0
Q9UJT1	0	0
Q9UJT0	1	0
Q9UJT2	1	2
Q5H943	0	0
Q8NGQ3	2	3
P21941	0	1
Q8IXE1	2	3
Q8IUK8	34	56
Q8TE99	0	0
Q9Y5C1	0	1
Q9NS69	3	7
Q9NS68	0	0
Q9NX18	3	7
Q9Y4G6	0	2
Q9NS61	0	12
Q9NS64	1	0
Q16891	1	7
Q16890	0	6
P12755	1	4
P12757	0	4
Q9BXA6	0	0
Q9P0N8	0	0
Q03431	2	19
Q9H6L4	49	2
P13489	0	6
Q9H6L2	0	0
Q96PE2	0	1
Q6ZRT6	0	0
Q9HD34	3	7
Q9P2J2	1	0
Q9HD36	0	17
Q14839	1	0
Q9HD33	1	7
Q9HC44	4	0
O76074	0	26
Q8NI51	1	0
Q8ND82	1	0
Q14833	2	3
Q14832	2	3
O14745	0	1
O14744	1	2
O14746	0	30
Q96PE5	0	0
Q5SRI9	0	1
P22415	1	4
Q5TKA1	1	9
Q9NZK5	1	11
Q8N5Y8	0	0
Q9NZK7	0	14
P15259	1	0
P50406	2	3
P16671	0	10
Q16099	0	3
P50402	1	9
P55160	1	0
P58182	2	3
Q96T37	1	2
P58180	2	3
P58181	2	3
Q96IK0	2	1
A6NEL3	0	0
A1A5D9	0	0
P10599	0	0
Q9P1W9	0	27
Q8NCH0	0	1
Q8NFQ8	1	0
Q9BR61	2	0
O14508	0	0
P52803	0	31
P16860	2	12
Q5JTH9	1	0
P55291	0	16
P55290	0	16
Q96C01	1	2
Q96C00	1	4
Q96C03	0	0
Q9P2P6	4	11
Q9P2P5	0	0
O75460	0	0
Q9BZ95	1	0
Q9P2P1	0	18
Q5T215	4	18
Q8IYU2	0	0
Q86WX3	1	2
Q9H7J1	1	0
Q86VF7	0	1
Q3T906	0	5
Q6P5R6	1	0
O60830	3	6
O60831	0	1
O60832	1	30
Q674X7	2	5
Q13107	0	0
Q00169	0	0
Q9Y2V7	16	8
Q9NTU7	34	56
Q9Y2V3	1	4
Q9Y2V2	5	5
Q9Y2V0	1	0
Q969X1	0	0
Q13576	0	1
A6NDV4	1	11
P61626	0	38
Q96EZ4	0	0
Q96EZ8	1	0
Q9P0J0	3	7
Q9P0J1	3	0
Q9P0J6	0	0
Q9P0J7	2	0
P29144	0	8
Q8NBJ7	4	28
Q8NBJ5	3	6
Q8NBJ4	1	10
Q9UL25	0	0
O75400	1	2
Q7LDG7	0	1
P20151	0	1
Q9UHF5	4	40
Q6IQ32	1	0
Q9NVW2	0	0
Q9UHF4	11	27
O00522	0	1
P01024	2	1
P01023	0	1
O00526	-	0
P17677	0	0
P17900	0	23
P35243	0	0
P49841	0	0
Q765I0	2	3
Q8NGL0	2	3
Q9Y4D2	2	3
Q9Y4D1	0	1
Q8NGL3	2	3
Q9Y4D7	0	1
P26639	0	6
Q9BXL8	1	4
Q13023	0	0
Q9BXL7	0	0
Q13021	5	12
Q9Y4D8	0	6
Q9H8G1	0	0
Q8IYJ3	0	0
Q6IPU0	1	5
Q8TE49	0	0
Q8N1K5	1	4
Q9BRQ6	0	7
Q9BRQ5	0	12
Q96R48	2	3
Q9BRQ4	1	0
P18283	1	0
Q8N302	1	2
Q86VY4	0	0
Q96R47	2	3
Q92752	0	1
Q92753	1	13
Q92750	1	0
P43007	1	0
Q6AI08	0	13
Q6ZV89	0	1
P43004	4	0
Q8IYU8	0	0
Q9BRQ0	1	0
Q6VUC0	0	0
Q9H2P9	0	0
Q02447	1	0
Q02446	1	0
Q99944	3	6
P48751	3	7
Q9NPI9	0	3
Q8TC21	0	1
Q99941	1	0
Q9NPI5	0	1
Q9NPI7	2	4
Q9BSF4	0	1
Q9NPI1	1	0
Q8TC29	0	0
Q9BSF0	49	9
P57078	0	0
Q6JVE5	1	0
Q66LE6	0	0
Q96JJ3	0	1
Q96JJ7	2	6
Q7Z7L7	1	0
Q7L8L6	0	0
Q9UI25	0	0
Q9UI26	0	0
P04179	0	11
Q7Z6J4	0	1
Q7Z6J6	0	16
P35658	1	0
Q7Z6J0	0	0
Q05397	0	1
Q7Z6J2	2	1
Q05823	0	0
Q14247	0	1
Q14244	1	10
Q14242	0	30
Q7Z6J9	1	2
Q14240	3	2
Q14241	1	2
Q8IWX8	1	2
P24928	1	0
P57077	0	0
P19429	0	1
Q8IWX5	5	0
Q8IWX7	1	0
Q06265	1	2
Q8N6P7	11	27
O43699	1	10
P15735	3	0
P07858	0	8
P52594	0	8
Q7RTN6	0	0
P46695	0	0
Q96LT9	4	2
Q96LT7	2	6
Q96LT4	0	0
Q6ZWI9	0	0
P58215	4	0
O94955	0	1
O94956	2	1
Q86YB7	1	2
O94952	1	0
O94953	1	0
Q14790	0	0
Q9H3V2	0	0
Q86YB8	0	8
Q86XZ4	2	1
Q6PP77	1	0
Q9NUR3	0	0
P16298	0	0
Q9BTA9	0	0
Q68E01	1	9
Q05996	6	10
Q8NCU1	1	5
Q96EV2	1	0
Q8NCU4	0	6
Q9GZR5	3	11
Q9GZR7	1	0
Q9GZR1	1	0
Q16795	0	7
O14910	0	3
P15085	0	8
Q16799	0	17
O43345	1	0
O43347	2	2
O14917	6	0
Q96FK6	1	7
Q7Z7D3	0	13
P56915	0	4
P25787	1	0
P25788	1	0
P25789	1	0
O60225	1	10
O60224	1	0
P81133	1	0
O60220	3	6
Q2QGD7	1	36
O60229	0	1
Q9NR20	0	0
Q8IZH2	1	2
Q6MZN7	2	1
Q9NUH8	3	2
P46937	0	0
Q9H1D0	0	0
Q6PIZ9	0	1
P13591	0	1
Q75T13	0	11
Q9Y6X8	0	1
Q96MR6	1	0
Q96MR9	0	0
P45379	0	1
P67936	0	1
P60033	1	2
P15813	0	8
Q9UNG2	0	0
P11413	3	2
Q9BUT1	0	0
P63220	3	2
P11142	0	0
Q9BUT9	3	0
Q86SX3	1	0
Q9C0A0	0	0
Q86SX6	0	8
A1L3X4	0	0
Q16134	3	7
P48637	4	11
P01570	0	27
Q8TBB1	0	0
Q8TBB0	5	2
Q8TBB5	1	0
P80404	3	0
Q8TBB6	1	0
Q15532	1	0
Q96GK7	0	0
Q76EJ3	0	10
P50876	0	9
P24278	1	0
Q8WTR7	1	2
P01848	1	0
Q7Z591	1	2
Q13568	1	0
Q13569	1	0
O95777	1	2
P25440	1	0
Q13564	0	0
Q8WWA0	0	17
Q13563	0	5
Q13561	0	0
P47804	5	0
Q9BY07	1	2
Q8NE65	0	0
Q9BWJ5	1	2
Q9BY08	5	5
Q8NE62	3	2
Q8NE63	1	0
Q6PCB0	0	1
P78317	0	0
Q9UBA6	1	2
Q9Y277	1	11
Q7Z444	0	1
A3KMH1	0	5
P01909	0	8
P78318	0	0
P01906	0	8
O00204	-	10
P01903	0	8
Q9H2M3	2	1
Q6P2H8	2	1
Q9H2M9	1	5
P08887	0	35
P49720	1	0
Q96G28	0	0
Q9NV06	1	0
Q9BYK8	1	10
Q9H210	2	3
Q8N9I9	0	0
Q96C92	0	0
Q96AQ9	4	0
Q9UQ49	0	12
Q7Z333	0	0
Q7L3V2	1	0
O00161	0	8
Q96AQ1	1	0
O00587	0	23
O95361	1	9
Q96AQ6	1	0
Q96AQ7	0	0
Q6ZVN8	0	32
Q9Y625	0	10
Q9Y624	0	51
Q9Y623	0	6
Q9BV73	4	5
Q9Y620	1	0
Q08708	0	10
P21145	0	8
O15294	1	0
Q86UC2	0	4
O15296	4	14
O15297	1	0
Q9NQN1	2	3
P15313	0	7
Q9C040	0	0
Q00577	1	9
Q8N9I0	0	12
Q12965	0	0
Q9BRD0	1	9
Q12967	0	1
Q9NXV2	0	0
Q12962	1	0
Q9UID3	3	2
Q9P253	0	8
P62841	3	2
Q9P255	0	0
Q96CW1	0	2
Q01628	0	27
Q01629	3	0
Q9P258	1	1
Q01151	1	0
P25800	1	1
P59020	2	1
Q9BWU1	1	0
P09228	2	1
P25205	1	9
P43116	2	3
Q6ZW61	0	0
A1E959	0	1
Q8IXR5	0	2
Q9Y6Y0	0	0
Q9Y6Y1	0	8
Q9BXF6	0	1
Q70IA6	0	0
P00505	0	6
Q9Y6Y9	0	20
O00499	0	1
P20794	1	0
O95944	0	8
Q9UKV8	1	2
O95947	1	4
O95948	1	0
Q9GZM5	0	11
Q9GZM6	2	3
Q9UKV5	0	0
Q9UKV3	1	2
Q9UKV0	1	0
Q9GZM3	0	0
P35606	0	8
P60568	0	1
O60732	1	2
P35609	0	1
P42566	0	9
O76082	0	0
O76083	0	26
O76080	0	0
O76081	2	3
Q13045	3	0
Q7Z353	4	0
Q6P1M0	0	17
Q6P1M3	0	0
Q8NFU5	0	0
O60885	1	0
P39060	0	1
P78537	0	5
P11908	0	13
Q9Y6J0	0	4
Q9Y4G8	0	1
P60709	0	1
Q9BXF9	0	13
Q5VV17	0	0
Q92569	0	1
Q6ZMZ0	0	0
Q9H4T2	4	4
Q92561	1	10
Q92560	1	0
Q05707	0	1
Q92562	0	14
Q92565	0	1
Q92564	1	0
Q92567	1	4
Q05586	0	3
P52566	0	1
P57087	0	1
P52564	0	0
P52565	0	1
P57082	0	4
P42694	1	0
P42696	0	6
Q9HAT8	0	20
O60641	0	5
Q53FZ2	1	1
P57088	1	2
P52569	0	0
Q8N823	0	0
Q14315	0	1
P20366	2	3
Q96HE9	1	0
P10915	0	1
Q8WU76	2	0
Q8WU79	1	0
Q96HE7	3	11
P10916	0	1
Q9Y3S1	0	0
P08311	0	1
Q9H251	4	12
Q9H252	0	12
Q9H255	2	3
Q9H254	0	1
Q9H257	0	0
P08319	18	42
Q8TED9	0	0
Q9H0Y0	0	6
Q8N9Z0	0	0
Q8TDQ7	0	0
Q8TED0	1	0
Q8TED1	0	0
P14635	1	0
P07992	1	0
O43598	1	2
P07996	0	1
P07998	0	6
O43597	0	9
O43592	0	2
O43593	1	0
P40121	1	5
O95563	3	7
P40123	0	1
O95561	2	1
Q8TDQ0	0	1
Q6PII3	1	2
O95568	1	2
Q8WUB8	1	0
Q96BP2	1	7
Q96BP3	0	0
Q9BQC3	0	0
Q86X52	0	10
Q86X53	1	0
Q9BQC6	1	7
Q86X55	1	10
Q71F23	1	5
Q86X59	1	0
Q52LJ0	1	0
Q9NYI0	0	1
Q99558	0	0
Q6IEY1	2	3
Q2QL34	2	1
Q99551	0	7
Q99550	0	0
Q76N89	0	1
Q96RQ3	0	9
Q96RQ1	0	0
Q12901	0	2
Q8N3U4	1	5
Q9NP98	0	1
Q9NQP4	0	5
P40879	0	1
Q9HCE5	0	33
P40692	0	0
P33778	1	0
Q9Y5E9	0	0
Q9NX36	0	0
P21964	0	25
Q02161	1	0
O43749	2	3
Q9Y5E2	0	0
Q9Y5E5	0	0
Q9Y5E4	2	1
Q9Y5E7	0	0
Q9NX38	0	0
Q13177	0	0
P07333	0	1
P07332	0	1
P07339	0	8
Q9BUB7	3	0
A4QPH2	5	0
Q96JW4	0	0
P61764	0	8
P23515	0	1
P61769	0	8
Q8NI77	0	5
P10600	0	15
Q9BRC7	0	2
Q14814	1	4
P10606	3	7
Q96PM5	0	0
Q9NZI2	0	12
Q9NZI7	4	0
Q9NZI6	4	2
Q9NZI5	1	10
Q9HD15	1	4
Q9UEW8	0	0
Q9NR48	1	0
A6NNF4	0	0
P62070	0	1
A6NER0	0	0
Q0WX57	3	50
P58753	0	0
P62079	2	1
O14764	0	0
O14763	0	0
Q9UJV3	0	0
P55103	0	15
Q96L12	1	11
Q96L14	1	9
Q9UJV9	0	0
Q9UJV8	0	0
Q92793	1	0
Q9HBR0	0	0
Q96KG7	0	5
O00602	0	1
P10144	0	1
Q6S545	3	7
Q8N2E2	0	0
Q06643	0	13
Q92791	0	0
Q6YI46	1	2
Q9NUM4	0	0
P80098	2	3
Q8NCN4	1	0
Q8NCN5	3	7
Q4VC31	0	0
P52824	2	1
Q9ULD9	0	0
Q9ULD8	0	12
Q96TA1	1	0
Q9ULD5	0	0
Q96C24	0	1
Q96C23	0	0
Q9ULD2	2	8
Q9P2R6	1	0
Q9ULD0	1	0
Q9NTW7	1	9
P51159	0	1
P55201	1	0
Q9UK85	9	11
P51153	0	1
P35030	0	1
P51157	2	1
Q9BTU6	0	1
Q9Y2P8	1	0
O60858	0	0
Q8N568	0	0
O14523	0	1
O60583	1	0
Q9Y2P5	3	8
Q9Y2P4	0	0
Q9Y2P7	0	0
Q9UMX2	4	13
Q8N8U9	0	15
Q9UMX0	0	0
Q9UMX1	4	25
Q9UMX6	2	26
P17735	5	0
Q3MJ62	0	5
Q3BBW0	0	0
Q8N8U2	1	2
Q13795	0	8
Q13794	0	17
Q13797	0	6
Q13796	0	1
Q13790	0	10
Q96EX3	0	0
Q96EX2	0	0
Q96NL6	0	5
Q96NL0	0	43
P18846	1	0
Q96NL3	5	11
Q8IY63	0	0
P27824	0	6
Q9Y478	0	0
Q9NVU0	1	0
P02462	0	1
Q5BKX8	2	1
Q00722	2	1
P02461	0	1
Q5BKX5	0	0
Q9Y473	0	0
Q5BKX6	0	0
B1AH88	0	6
P23142	0	1
Q9Y3L3	0	1
Q96S96	0	6
P17655	0	9
Q9Y2H2	0	0
O14525	0	0
P05204	1	0
Q9Y2H5	0	1
P14384	2	1
Q96S94	1	0
P17658	0	0
Q9UM54	0	0
O00548	0	23
Q63HQ2	1	0
Q15029	1	2
Q96MY1	1	0
Q6PJ69	0	0
Q8NEB9	0	0
Q15025	0	30
Q15024	1	2
Q15027	0	-
O00541	1	0
Q15021	1	5
Q15020	1	2
Q7L0X0	0	0
Q15022	1	0
Q86V85	2	0
Q9Y2H9	0	0
Q86V87	2	1
Q86V86	0	0
Q86V81	1	2
Q15052	0	1
O15173	3	9
Q9UI12	0	7
O00592	0	0
Q86V88	0	33
P09693	0	1
Q14D04	0	0
Q8NGJ8	2	3
Q8NGJ9	2	3
Q9Y4J8	0	1
O95219	0	15
Q8NGJ2	2	3
Q96A83	0	1
Q8NGJ0	2	3
Q8NGJ1	2	3
Q8TCG2	0	1
Q8TCG1	0	0
Q8NGJ5	2	3
P52179	0	9
Q2M2E3	2	1
Q9P1Z3	44	52
Q96R27	2	3
Q9P1Z0	1	0
Q9BZH6	1	0
Q96R28	2	3
Q5JWR5	0	0
Q5JPF3	0	0
Q8TEW6	0	1
Q8WWW8	0	1
P62987	0	0
P34741	0	10
Q8TEW0	0	1
P46059	0	15
Q92953	0	12
Q8IY50	0	0
Q9H2R5	0	6
Q9BVG3	0	4
Q86U38	1	1
Q92959	0	8
Q92777	0	26
Q9BVG9	1	0
Q9BVG8	0	5
Q92772	0	0
Q99961	0	0
Q99962	0	0
Q99963	0	1
Q99788	2	3
Q99965	6	10
Q99966	1	0
Q99967	1	0
Q99784	0	5
Q99969	0	8
P42224	0	13
P42226	0	27
Q9UI42	32	25
Q9UI43	1	0
P16066	4	12
Q9UI46	1	0
Q9UI47	0	1
Q01453	3	17
P22234	0	8
P62191	1	0
Q01459	2	1
P04150	1	0
P26439	2	3
Q96JH8	0	4
P04155	6	0
P04156	4	12
Q6PCD5	0	0
P26927	0	0
Q96JH7	0	0
O75683	1	0
P49903	1	6
Q9H089	0	0
O75689	0	15
O75688	0	0
Q9H081	1	5
Q9H082	0	0
Q9H8E8	1	0
Q5JT25	2	1
Q8N584	0	0
P19404	3	7
P02808	6	10
Q68CQ7	0	0
Q68CQ4	1	0
Q96D31	0	12
Q8N6R1	1	9
Q8N6R0	1	0
P43166	3	7
Q8WY64	0	0
Q96LV5	0	0
P49190	2	19
Q8N0W3	0	0
P54687	0	4
Q86YL7	0	10
P15311	0	1
Q3LXA3	0	18
Q6Q0C1	0	1
Q6Q0C0	0	0
Q9NUP9	0	0
O14976	0	29
O14977	0	13
O14974	0	1
O43364	1	4
Q9NUP1	0	8
O14979	0	6
Q5TID7	1	0
Q9GZP9	0	0
Q9GZP8	2	1
P09848	0	6
P33240	1	2
Q9GZP4	2	0
C9JR72	1	0
Q9GZP1	0	0
Q9GZP0	0	1
Q9H9A6	0	8
P49448	10	0
O75027	3	7
Q05513	0	0
Q8IZV2	0	1
Q05516	1	0
P49441	1	0
Q05519	1	2
Q96FI4	1	5
P49447	5	0
Q8TD57	0	8
Q9HCU4	0	1
Q9HCU5	0	0
Q9HCU0	0	0
Q8IWZ6	0	6
Q86Y97	1	0
Q8IWZ4	0	0
Q02880	1	0
Q9HCU8	1	9
Q0VAQ4	0	0
O00187	0	1
O75339	0	15
A8MW95	0	0
A8MW92	1	30
Q3SY52	0	8
Q9UNA0	0	1
Q9UNA1	0	1
Q9UNA4	0	0
P61371	1	4
Q96MP5	1	0
Q8NGX1	2	3
Q13405	1	7
Q13404	0	0
P59541	2	3
P59540	2	3
P59543	2	3
Q13402	0	12
Q7Z2X7	1	9
Q7Z2X4	0	1
Q13409	0	0
P05787	0	1
Q9HAK2	1	0
Q53QW1	2	1
P05783	0	1
P11169	0	6
P11168	0	6
Q9BUZ4	0	0
P11161	1	4
O96011	0	11
Q9NQ69	0	4
O75335	0	8
Q8TC41	0	0
O43148	1	0
Q6P2D0	1	0
P01860	0	1
Q5XLA6	0	0
P78383	2	1
P50851	0	0
P25311	0	11
Q96GE5	0	0
Q6P1K1	2	1
O95718	1	0
Q14439	0	0
Q8NHR7	2	1
O95711	0	20
Q13541	0	0
Q13542	2	0
O95715	2	3
O95714	0	0
Q13546	0	0
O95716	0	1
Q9NY93	1	0
Q9NY97	6	10
Q5T750	0	0
Q9NY99	0	1
Q9BWL3	0	0
Q9UBC9	0	1
O00221	0	0
O00220	0	0
Q96J01	1	2
Q96J02	0	0
Q9UBC0	1	10
Q9UBC1	1	1
Q9UBC2	0	8
Q9UBC3	1	0
Q6UXS9	0	0
Q9UBC5	0	1
P50148	2	3
Q9BYN0	0	6
Q92900	1	2
Q96N77	1	0
Q96BM9	0	0
Q13895	1	11
Q9NVM4	1	0
P21397	0	0
Q9H2W6	1	7
P33908	4	4
Q92905	1	0
Q6ZS10	0	1
Q9BVX2	0	0
Q9NQ90	0	0
Q9NQ92	1	0
Q9NV66	0	0
Q9NV64	0	0
Q6V9R5	2	0
P18433	0	1
Q96AW1	0	5
P20929	0	1
Q02086	1	0
Q5QJ74	0	0
Q12955	0	1
Q9H6R4	1	0
Q6K0P9	0	0
Q5VWZ2	2	0
P10412	1	0
O15062	1	0
O00148	1	2
Q9ULU4	1	0
Q9H6R6	0	6
Q86XK2	0	0
Q86XK3	0	13
P10646	0	1
P35998	1	0
Q29940	0	8
Q9BV57	0	9
Q86WN2	0	5
Q86UE3	0	0
Q5T0W9	1	2
Q86UE4	1	0
Q08722	0	1
P48551	0	27
P48552	1	0
Q9NQL2	0	7
Q16557	0	4
Q9H6R3	0	15
Q92956	0	13
Q5SZK8	0	1
Q9UIF8	1	0
Q9UIF9	1	0
Q9P273	0	7
Q9P270	1	5
P62861	3	2
Q9P275	1	0
P51813	0	1
Q92890	0	0
P51811	2	5
P51810	0	0
P51817	0	0
P51816	0	1
P51815	0	0
Q92896	0	0
O60383	1	15
Q969M7	0	0
Q969M1	0	1
Q969M2	0	1
Q969M3	0	11
P02787	0	1
Q8N1B4	0	8
O60447	1	0
Q8TAF7	2	2
Q9BZY9	0	0
Q6PIJ6	0	0
P02788	0	10
P07237	0	8
P39880	0	0
P07942	0	1
O14493	0	31
O14492	0	1
O14495	0	1
O14494	5	0
O14497	1	0
Q9UKT8	1	0
Q9UKT9	1	13
Q96EY4	0	6
Q9HC62	1	0
P09067	1	0
P30279	1	0
P07098	14	16
Q5JS37	0	0
Q9UKT4	1	0
Q9UKT5	1	0
Q9H1I8	1	0
P07099	1	16
P0C869	5	14
Q8NFW5	1	4
P35372	2	3
Q8NFW1	0	1
Q86TI0	0	1
P0C860	1	30
Q86TI2	0	0
P0C862	0	9
Q8NFW8	0	0
Q8NFW9	0	1
Q9NRR8	0	0
Q562F6	1	5
Q9NRR3	0	1
Q9NRR6	0	1
Q9NRR4	1	0
Q9NRR5	0	0
P28370	1	0
P39086	0	3
P32971	0	-
P32970	0	17
Q5JTW2	4	5
P43630	0	8
P43631	0	8
P43632	0	8
Q86VS3	2	1
Q92547	1	0
Q92546	1	0
Q92545	0	0
Q92544	3	7
P0C1S8	1	0
P30825	2	0
Q9UIG0	1	0
Q5T7M9	4	5
O75901	0	0
A1L390	0	0
Q9H4Z3	1	0
P12544	1	1
P20340	0	1
P05412	1	0
P05413	0	1
Q9HAV0	2	3
Q9HAV7	3	0
Q9HAV5	0	0
Q9HAV4	1	2
P22557	0	1
Q96SB8	1	28
Q03001	0	1
Q6PJF5	0	0
Q96SB4	1	0
Q96SB3	0	0
Q8N806	1	2
Q9H270	0	8
Q06710	0	0
Q14457	0	17
Q8WU10	1	2
Q5VZV1	0	0
Q8WU17	0	0
Q14451	0	7
P14652	1	0
P14653	1	4
Q8TEB1	1	0
Q8TEB7	0	0
Q9Y3Q8	4	13
Q9Y3Q7	0	0
Q8NEU8	0	1
Q9Y3Q4	44	52
Q9Y3Q3	0	8
O75096	0	9
Q659C4	2	0
Q8N9T8	1	0
O00141	0	0
P14778	0	20
Q5UE93	2	3
P09758	0	7
Q8N118	0	0
P15954	3	7
A5PLL7	0	11
Q8N111	0	19
O43745	0	0
P26599	1	2
Q9H5X1	1	0
O95544	0	9
Q9UIG4	0	1
P51589	1	0
Q99572	0	1
Q99571	4	21
Q02985	2	1
Q99576	0	13
Q99575	1	22
Q99574	0	1
A1L4K1	0	1
Q9BQA5	1	2
Q14802	5	16
Q99578	0	1
Q9BQA1	1	2
P22061	0	6
Q9UHP3	0	0
Q96S95	0	0
Q8N3K9	0	35
P82650	1	7
Q8NCJ5	1	0
Q5W0V3	4	0
P11597	0	10
Q9HDB5	0	29
Q8IUW3	0	0
P36508	1	0
P36507	0	2
Q0VG06	0	13
P81877	1	4
Q8IXI1	0	1
Q8IXI2	0	1
P19367	0	6
Q9NX52	0	1
Q9NX55	1	41
Q9NX57	0	0
Q9NX58	1	2
P05455	1	0
Q6UXN8	0	1
Q7L2Z9	1	5
Q16322	1	0
P07315	6	22
Q6NW40	0	32
Q2M1K9	1	0
Q6UWJ1	0	0
Q0VDD7	1	5
P16389	0	12
Q8NI17	0	35
Q5TAQ9	1	0
P10620	4	14
Q9BRA2	0	7
Q9H6H4	0	0
Q9BRA0	0	0
Q29718	0	8
P22455	0	1
Q9UKP5	0	1
P22459	0	12
Q5T447	0	0
Q9BQ04	1	0
Q5T6V5	2	0
O14709	0	0
Q9BRS8	2	1
A6NND4	2	3
P15291	6	10
Q00444	0	0
Q96DX7	0	2
Q96DX4	0	0
Q96DX5	0	0
Q96A25	0	8
Q9UJX4	1	0
Q96A26	3	7
Q9UJX0	0	0
Q96A23	0	1
Q96A22	2	1
Q8NCL4	6	1
Q5T4T6	2	1
Q5BJH7	0	7
Q9NR71	0	0
Q5BJH2	3	17
P56470	0	11
Q9UJ55	0	6
Q9HBT7	0	0
P13942	0	1
Q1A5X6	0	0
Q9NUK0	1	0
P84085	0	1
P58499	2	16
Q96N95	4	4
Q9P2T1	0	13
Q96TC7	0	6
Q5VIR6	0	8
Q96KQ7	1	0
Q96KQ4	0	0
Q03167	0	15
Q15942	0	1
Q03164	1	0
Q6ZRP7	3	0
P13995	4	6
Q9ULB1	0	29
P34903	5	24
Q9ULB5	0	16
Q9ULB4	0	16
Q03169	0	0
P23677	0	1
Q9Y2R2	0	1
Q5T7P8	0	29
O60870	1	0
Q9UNK4	0	14
Q9Y2R5	1	7
Q96B23	1	0
Q9UKK9	0	2
Q9Y2R9	1	2
P29762	8	2
Q6XUX3	0	0
P30049	3	7
P30048	0	6
Q9UPU7	0	6
Q9H8W4	4	9
Q8N8S7	0	1
P30041	0	6
[truncated: 13,830 more rows]
